# Supplementary material for: Antimicrobial Resistance in Wildlife in Guadeloupe (French West Indies): Distribution of a Single blaCTX–M–1/IncI1/ST3 Plasmid Among Humans and Wild Animals
Source: Front Microbiol. 2020 Jul 10;11:1524. doi: 10.3389/fmicb.2020.01524 (PMC7366356; doi:10.3389/fmicb.2020.01524)
Supplement: TABLE S2 — Characteristics of extended-spectrum beta-lactamase-producing Escherichia coli isolates from wild animals and humans in Guadeloupe (French West Indies). [file Table_2.XLSX]

## Sheet: Feuil3
						PLASMIDIC INCOMPATIBILITY GROUPS																				ANTIBIOTIC RESISTANCE GENES
Isolate identification	Species	Host	Sequence type	Biological sample	Hospital-acquired infection	IncFIB	IncFII	IncFIC(FII)	IncFIA	IncI1	IncQ1	ColpVC	Col156	Col(MG828)	IncR	IncN	IncX1	IncX4	IncY	IncP	IncB/O/K/Z	Col(BS512)	IncA/C	ColRNAI	Col8282	aac(3)-IIa	aac(3)-IId	aadA1	aadA2	aadA5	aph(3'')-Ib	aph(3')-Ia	aph(6)-Id	blaCTX-M-1	blaCTX-M-14	blaCTX-M-15	blaCTX-M-27	blaTEM-12	blaTEM-150	blaTEM-20	blaOXA-1	blaTEM-1	blaTEM-235	catA1	catB3	dfrA1	dfrA12	dfrA14	dfrA17
EC1	Escherichia coli	Bird	196	Cloacal swab	-	0	0	0	0	1	0	0	0	0	0	0	0	0	0	0	0	0	0	0	0	0	0	0	0	1	0	0	0	1	0	0	0	0	0	0	0	0	0	0	0	0	0	0	1
EC2	Escherichia coli	Rat	1844	Feces	-	0	0	1	0	1	1	0	0	0	0	0	0	0	1	1	0	0	0	0	0	0	0	1	0	0	1	0	1	0	0	0	0	0	0	1	0	0	0	0	0	1	0	0	0
EC23	Escherichia coli	Bird	6914	Cloacal swab	-	1	0	0	1	1	0	0	0	0	0	0	0	0	0	0	0	0	0	0	0	0	0	0	0	0	0	0	0	1	0	0	0	0	0	0	0	0	0	0	0	0	0	0	0
EC28	Escherichia coli	Rat	117	Feces	-	1	1	1	0	1	0	0	0	0	0	0	0	0	0	0	1	0	0	0	0	0	0	0	0	0	0	0	0	1	0	0	0	0	0	0	0	0	0	0	0	0	0	0	0
EC3	Escherichia coli	Rat	155	Feces	-	1	0	1	1	1	0	0	0	0	0	0	0	0	0	0	0	0	0	0	0	0	0	0	0	0	1	0	1	0	0	0	0	0	0	1	0	0	0	0	0	0	0	1	0
EC38	Escherichia coli	Human	349	Blood	yes	0	0	1	0	1	0	0	0	0	0	0	1	0	0	0	0	0	0	0	0	0	0	0	0	0	0	0	0	1	0	0	0	1	0	0	0	0	0	0	0	0	0	0	0
EC39	Escherichia coli	Human	131	Blood	yes	1	1	0	1	0	0	0	0	0	0	0	0	0	0	0	0	0	0	0	0	1	0	0	0	0	0	0	0	0	0	1	0	0	0	0	0	0	0	0	0	0	0	0	0
EC4	Escherichia coli	Rat	155	Feces	-	1	0	1	1	1	0	0	0	0	0	0	0	0	0	0	0	0	0	0	0	0	0	0	0	0	1	0	1	0	0	0	0	0	0	1	0	0	0	0	0	0	0	1	0
EC40	Escherichia coli	Human	38	Blood	yes	1	1	0	0	0	0	0	0	0	0	0	0	0	0	0	0	0	0	0	0	0	0	0	0	0	0	0	0	0	0	0	1	0	0	0	0	0	0	0	0	0	0	0	0
EC41	Escherichia coli	Human	131	Blood	yes	1	1	0	0	0	0	0	1	0	0	0	0	0	0	0	0	0	0	0	0	0	0	0	0	1	1	0	1	0	0	1	0	0	0	0	0	1	0	0	0	0	0	1	1
EC42	Escherichia coli	Human	131	Blood	yes	1	1	0	0	0	0	0	1	0	0	0	0	0	1	0	0	0	0	0	0	0	0	0	0	1	1	0	1	0	0	0	1	0	0	0	0	0	0	0	0	0	0	0	1
EC43	Escherichia coli	Human	131	Blood	yes	1	1	0	1	0	0	0	1	0	0	0	0	0	0	0	0	0	0	0	0	0	0	0	0	1	1	0	1	0	0	0	1	0	0	0	0	0	0	0	0	0	0	0	1
EC45	Escherichia coli	Human	124	Blood	no	1	0	0	1	1	0	0	0	0	0	0	0	0	0	0	0	0	0	0	0	0	0	0	0	0	0	0	0	1	0	0	0	0	0	0	0	0	0	0	0	0	0	0	0
EC46	Escherichia coli	Human	131	Blood	yes	0	1	0	1	0	0	0	0	0	0	0	0	0	0	0	0	0	0	0	0	0	0	0	0	0	0	0	0	0	0	1	0	0	0	0	0	0	0	0	0	0	0	0	0
EC47	Escherichia coli	Human	69	Blood	no	1	1	0	1	0	0	0	0	0	0	0	0	0	0	0	0	0	0	0	0	0	0	0	0	0	1	0	1	0	1	0	0	0	0	0	0	1	0	0	0	0	0	1	0
EC48	Escherichia coli	Human	95	Blood	yes	1	1	0	0	0	0	0	0	0	0	0	0	0	0	0	0	0	0	0	0	0	0	0	0	0	0	0	0	0	0	0	1	0	0	0	0	0	1	0	0	0	0	0	0
EC49	Escherichia coli	Human	131	Blood	no	1	1	0	1	0	0	0	1	0	0	0	0	0	0	0	0	0	0	0	0	0	0	0	0	1	0	0	0	0	0	1	0	0	0	0	1	0	0	0	1	0	0	0	1
EC5	Escherichia coli	Iguana	10	Feces	-	1	1	0	1	0	0	0	0	0	0	0	0	0	0	0	0	0	0	0	0	0	0	1	0	0	1	1	1	0	0	0	0	0	1	0	0	0	0	0	0	1	0	0	0
EC50	Escherichia coli	Human	69	Blood	yes	1	1	0	0	0	0	0	0	0	0	0	0	0	0	0	0	0	0	0	0	0	0	0	0	0	0	0	0	0	0	0	1	0	0	0	0	0	0	0	0	0	0	0	0
EC51	Escherichia coli	Human	131	Blood	yes	0	0	0	0	0	0	0	0	0	0	0	0	0	0	0	0	1	0	0	0	1	0	0	0	0	0	0	0	0	0	1	0	0	0	0	1	0	0	0	1	0	0	0	0
EC52	Escherichia coli	Human	131	Blood	yes	1	1	0	1	0	0	0	1	0	0	0	0	0	0	0	0	0	0	0	0	0	0	0	0	0	0	0	0	0	0	0	1	0	0	0	0	0	0	0	0	0	0	0	0
EC53	Escherichia coli	Human	131	Blood	yes	1	0	0	0	0	0	0	1	0	0	1	0	0	0	0	0	0	0	0	0	0	0	0	0	0	0	0	0	0	0	0	1	0	0	0	0	0	0	0	0	0	0	0	0
EC54	Escherichia coli	Human	1193	Blood	yes	1	0	0	1	0	0	0	1	0	0	0	1	0	0	0	0	1	0	0	0	0	0	0	0	0	0	0	0	0	0	0	1	0	0	0	0	0	0	0	0	0	0	0	0
EC55	Escherichia coli	Human	410	Blood	no	1	1	0	1	0	0	0	1	0	0	0	0	0	0	0	0	0	0	0	0	1	0	0	0	1	1	0	1	0	0	1	0	0	0	0	0	0	0	1	0	0	0	0	1
EC56	Escherichia coli	Human	410	Blood	yes	1	1	0	1	0	0	0	0	0	0	0	0	0	0	0	0	0	0	0	0	1	0	0	0	1	1	0	1	0	0	1	0	0	0	0	1	0	0	1	1	0	0	0	1
EC57	Escherichia coli	Human	131	Blood	yes	0	0	0	0	0	0	0	1	0	0	0	0	0	0	0	0	1	0	1	0	1	0	0	0	0	0	0	0	0	0	1	0	0	0	0	0	0	0	0	0	0	0	0	0
EC58	Escherichia coli	Human	131	Blood	yes	0	0	0	0	0	0	0	0	0	0	0	0	0	0	0	0	1	0	0	0	1	0	0	0	0	0	0	0	0	0	1	0	0	0	0	0	0	0	0	0	0	0	0	0
EC7	Escherichia coli	Rat	196	Feces	-	0	0	0	0	1	0	0	0	0	0	0	0	0	0	0	0	0	0	0	0	0	0	0	0	1	0	0	0	1	0	0	0	0	0	0	0	0	0	0	0	0	0	0	1
[truncated: 12 more columns]
