# Supplementary material for: Antimicrobial Resistance in Wildlife in Guadeloupe (French West Indies): Distribution of a Single blaCTX–M–1/IncI1/ST3 Plasmid Among Humans and Wild Animals
Source: Front Microbiol. 2020 Jul 10;11:1524. doi: 10.3389/fmicb.2020.01524 (PMC7366356; doi:10.3389/fmicb.2020.01524)
Supplement: TABLE S3 — Metadata on IncI1/blaCTX–M–1/ST3 plasmids in the PLSDB database sharing >99% nucleotide identity with pESBL20150178 and having aadA5/dfrA17/sul2 resistance genes. [file Table_3.XLS]

## Sheet: Feuil1
Isolate identification	Plasmid name PLSDB	Species	GenBank reference	Pubmed ID	Length	% identity	Country	Date	Host	pMLST	blaCTX-M1	aadA5	dfrA17	sul2
HV114	pHV114	Escherichia coli	KM377238	25324838	110997	1	Switzerland	2013	Chicken	3	1	1	1	1
ESBL20150178	pESBL20150178	Escherichia coli	MK181568	31089683	108457	0.999893	Denmark	2014	Human	3	1	1	1	1
199	P199	Escherichia coli	MK181559	31089683	122616	0.999874	Denmark	2014	Pig	3	1	1	1	1
HV292	pHV292	Escherichia coli	KM377239	25324838	117269	0.999857	Switzerland	2013	Chicken	3	1	1	1	1
2305	p2305	Escherichia coli	MG948334	-	111670	0.999857	Switzerland	2018	Dog	3	1	1	1	1
C59	pC59-112	Escherichia coli	NC_025143	24920651	112330	0.999857	Switzerland	2013	Chicken	3	1	1	1	1
H2291	pH2291-112	Escherichia coli	NC_025176	24920651	112671	0.999857	Switzerland	2013	Human	3	1	1	1	1
13948	RCS76_pI	Escherichia coli	LT985286	30080134	110066	0.999857	France	2004	Bovine	3	1	1	1	1
14006165	p14006165	Escherichia coli	MK181560	31089683	111287	0.999809	Denmark	2014	Chicken	3	1	1	1	1
CTX-M1-MU2	pCTXM1-MU2	Escherichia coli	MF152729	29899511	110255	0.999809	Australia	2015	Pig	3	1	1	1	1
15076331	p15076331	Escherichia coli	MK181558	31089683	109836	0.999809	Denmark	2014	Pig	3	1	1	1	1
15124679	p15124679	Escherichia coli	MK181564	31089683	109726	0.999452	Denmark	2014	Duck	3	1	1	1	1
654	RCS34_p	Escherichia coli	LT985235	30080134	111333	0.999377	France	2002	Human	3	1	1	1	1
305	pESBL-305	Escherichia coli	NC_024979	25169863	107552	0.999377	Netherlands	2014	Chicken	3	1	1	1	1
ESBL20150097	pESBL20150097	Escherichia coli	MK181567	31089683	107761	0.999329	Denmark	2014	Human	3	1	1	1	1
04-021	p04-021	Escherichia coli	MH847038	30269783	108813	0.999329	France	2004	Pig	3	1	1	1	1
15090172	p15090172	Escherichia coli	MK181562	31089683	107705	0.999281	Denmark	2014	Pig	3	1	1	1	1
15095941	p15095941	Escherichia coli	MK181563	31089683	83410	0.999232	Denmark	2014	Chicken	3	1	1	1	1
C-60	pC60-108	Escherichia coli	NC_025142	24920651	108661	0.999232	Switzerland	2010	Chicken	3	1	1	1	1
C-49	pC49-108	Escherichia coli	NC_025144	24920651	108660	0.998403	Switzerland	2010	Chicken	3	1	1	1	1
03-235	RCS72_pI	Escherichia coli	LT985273	30080134	108661	0.998403	France	2003	Chicken	3	1	1	1	1
14019095	p14019095	Escherichia coli	MK181557	31089683	108490	0.998403	Denmark	2014	Chicken	3	1	1	1	1
14011252	p14011252	Escherichia coli	MK181561	31089683	108214	0.998403	Denmark	2014	Chicken	3	1	1	1	1
HV295	pHV295	Escherichia coli	KM377240	25324838	105076	0.994466	Switzerland	2013	Chicken	3	1	1	1	1
